# Supplementary material for: Metabolomics Profiling of Cystic Renal Disease towards Biomarker Discovery
Source: MDPI journal article supplement (doi:10.3390/biology10080770), 2021-08-13
Supplement: s1 [file s1]

# Metabolomics Profiling of Cystic Renal Disease Towards Biomarker Discovery

Dalia Sriwi<sup>1‡</sup>, Mohamad S. Alabdajabar<sup>1‡</sup>, Minnie Jacob<sup>2</sup>, Essa M. Sabi<sup>3</sup>, Xinyun Gu<sup>4</sup>, Ahmad Mujammami<sup>3</sup>, Liang Li<sup>4</sup>, Maged H Hussein, Majed Dasouki<sup>2</sup>, Anas M. Abdel Rahman<sup>1,2, 6\*</sup>

<sup>1</sup>Department of biochemistry and molecular medicine, College of Medicine, Alfaisal University, Riyadh, Saudi Arabia

<sup>2</sup>Metabolomics Section, Department of Clinical Genomics, Center for Genomics Medicine, King Faisal Specialist Hospital and Research Centre (KFSHRC), Riyadh, Saudi Arabia

<sup>3</sup>Clinical Biochemistry Unite, Department of Pathology College of Medicine, King Saud University, Riyadh, Saudi Arabia

<sup>4</sup>Department of Chemistry, University of Alberta, Edmonton, AB, T6G 2R3, Canada

<sup>5</sup>King Faisal Specialist Hospital and Research Centre (KFSHRC), Riyadh, Saudi Arabia.

<sup>6</sup>Department of Chemistry, Memorial University of Newfoundland, St. John's, NL, A1B 3X7, Canada

\*Correspondence to Anas Abdel Rahman,

Metabolomics Section, Department of Clinical Genomics, Center for genomics medicine, King Faisal Specialist Hospital and Research Centre (KFSHRC), MBC#03

PO Box 3354, Riyadh 11211, Kingdom of Saudi Arabia

Tel#: +966114647272 Ext. 36481

Fax#: +966114424585

Email: aabdelrahman46@kfshrc.edu.sa

‡ DS and MSA contributed equally and are first authors

## Supplementary Figures:

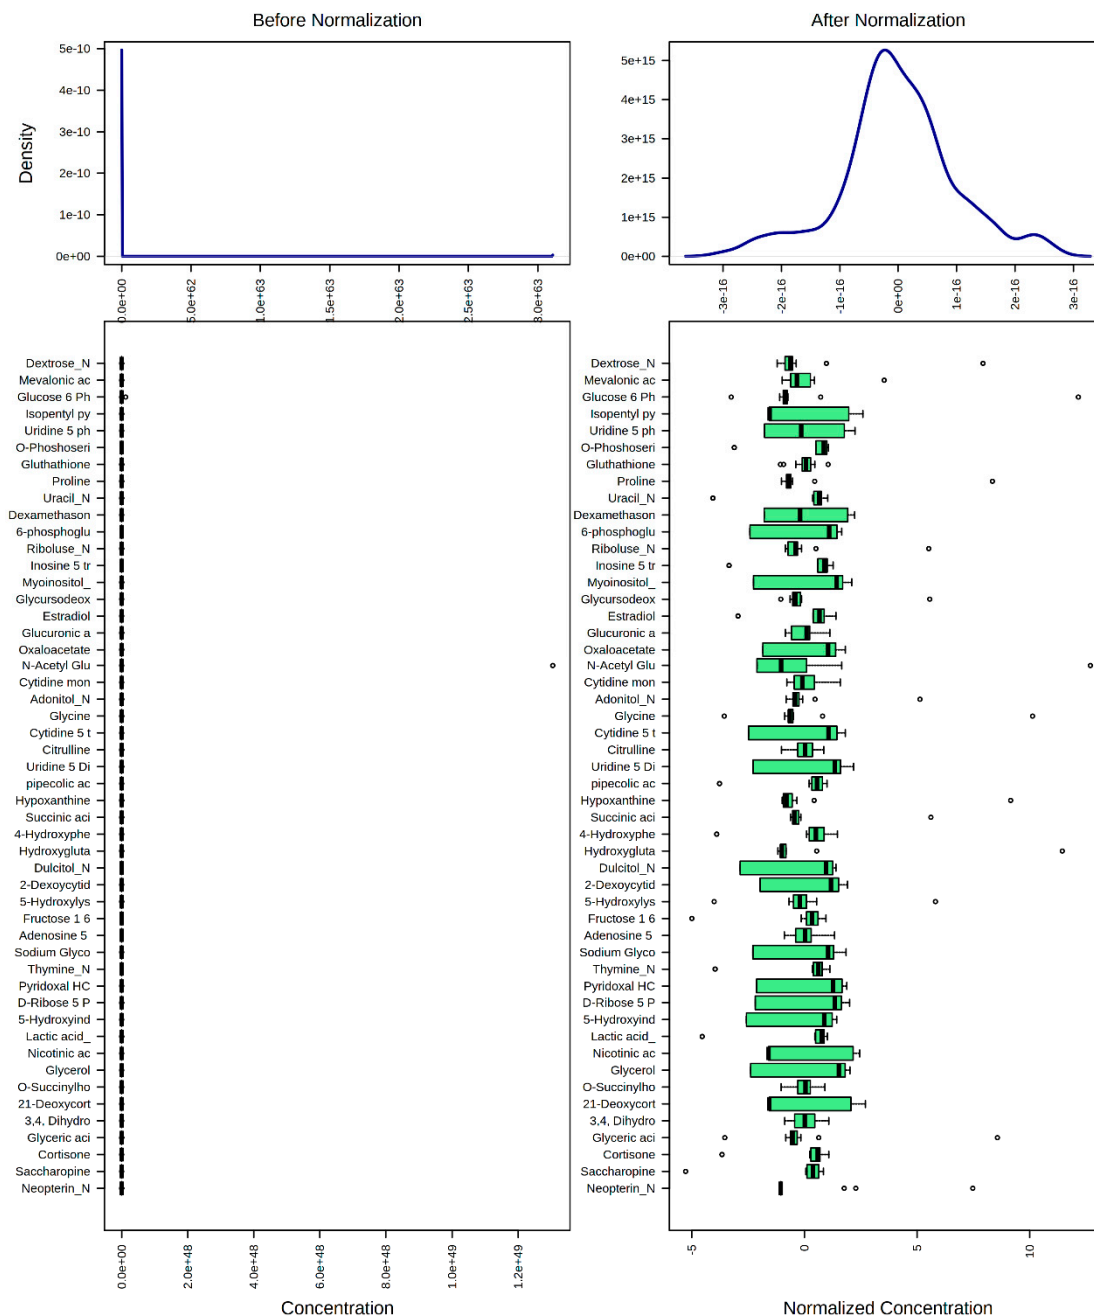

**Figure S1:** Normalization of data in patients with cystic renal disease (CRD) against the Ctrl groups was performed to remove systemic variations in relation to biological differences, and ensure the normal distribution.

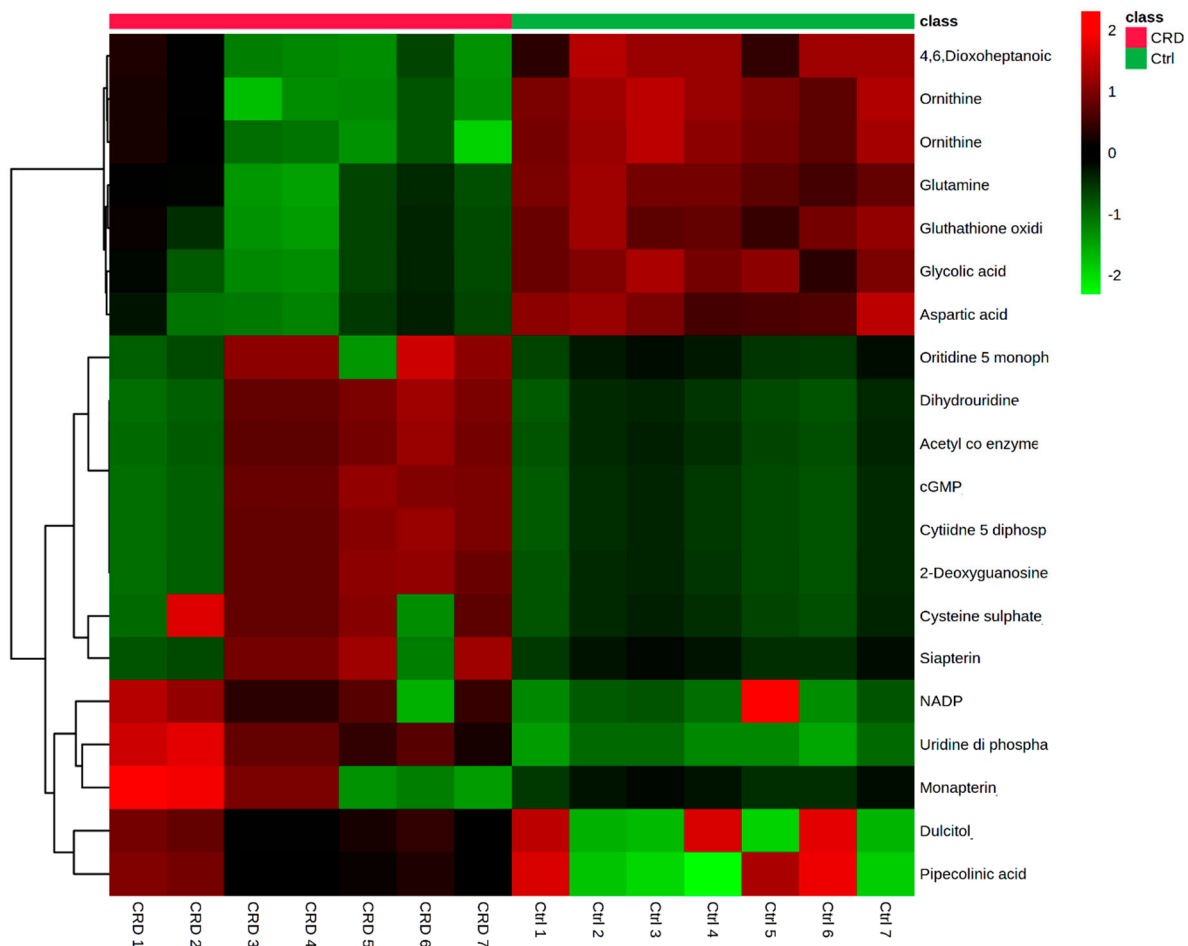

**Figure S2:** Heat map in DBS shows altered metabolites in patients with cystic renal disease (CRD) and Ctrl groups. The heat maps were created by entities Hierarchical clustering for the normalized data where the similarity was based on Pearson

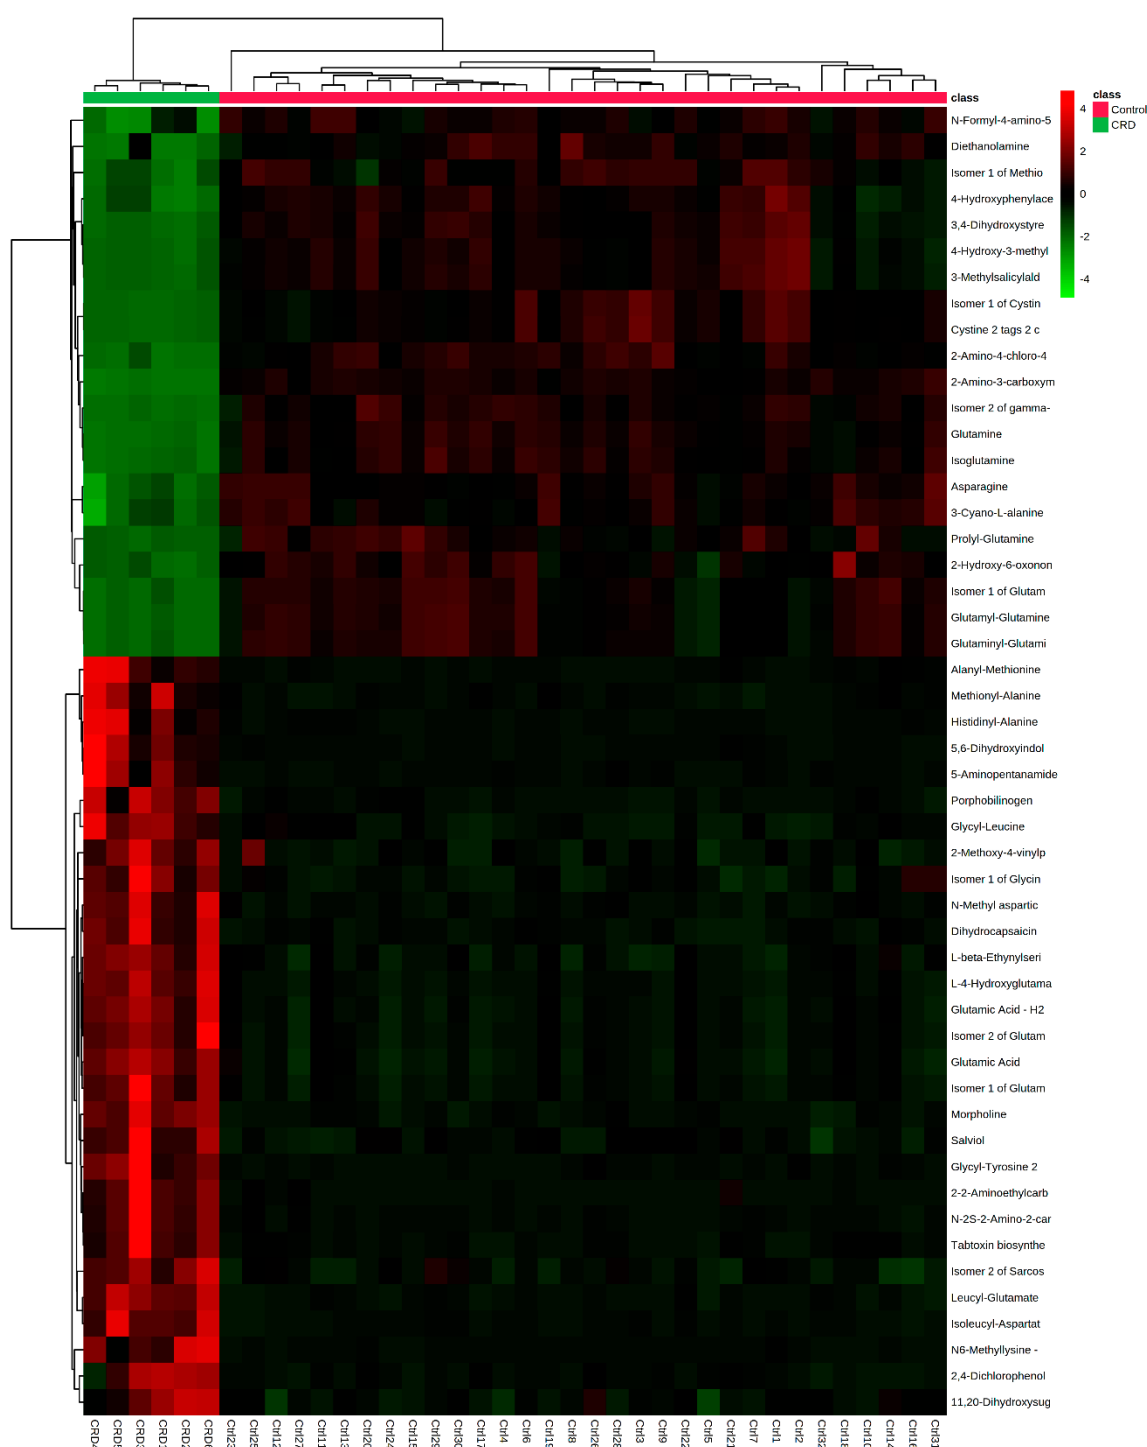

**Figure S3:** Heat map in serum through CIL targeted analysis shows altered metabolites in patients with cystic renal disease and controls. The heat maps were created by group Hierarchical clustering for the averaged normalized data where the similarity was based on Euclidean.

**Supplementary Tables:****Table S1:** Statistically significant pathways dysregulated in CRD patients compared to healthy control based on DBS metabolomics profile

| Pathway Name                                | <b>-log(p)</b> | <b>FDR</b> | <b>Impact</b> |
|---------------------------------------------|----------------|------------|---------------|
| Pyrimidine metabolism                       | 3.3018         | 0.041921   | 0.13965       |
| Glutathione metabolism                      | 2.8872         | 0.043665   | 0.02878       |
| Arginine biosynthesis                       | 2.7737         | 0.043665   | 0.06091       |
| Nicotinate and nicotinamide metabolism      | 2.6821         | 0.043665   | 0.0           |
| Alanine, aspartate and glutamate metabolism | 1.8932         | 0.21485    | 0.42869       |
| Glyoxylate and dicarboxylate metabolism     | 1.734          | 0.25829    | 0.03175       |
| Purine metabolism                           | 1.5683         | 0.32424    | 0.069         |
| Pantothenate and CoA biosynthesis           | 1.3514         | 0.40733    | 0.00714       |
| Citrate cycle (TCA cycle)                   | 1.3104         | 0.40733    | 0.1545        |

**Table S2:** Significantly changed metabolites in CRD patients compared to healthy controls based on DBS metabolomics profile (FDRp and Fold change cut-offs are 0.05, and 2, respectively)

| Name of the metabolite      | HMDB        | log2(FC) | -Log10(p) |
|-----------------------------|-------------|----------|-----------|
| Deoxyribose 5-phosphate     | HMDB0001031 | -2.7455  | 1.4857    |
| Ornithine                   | HMDB0000214 | -2.5939  | 3.3467    |
| Succinylacetone             | HMDB0000635 | -1.8121  | 2.6264    |
| L-Aspartic acid             | HMDB0000191 | -1.6616  | 1.5995    |
| Taurine                     | HMDB0000251 | -1.6095  | 1.3622    |
| Taurodeoxycholic acid       | HMDB0000896 | -1.4678  | 1.4059    |
| Glycolic acid               | HMDB0000115 | -1.4657  | 1.9758    |
| Adenosine monophosphate     | HMDB0000045 | -1.2176  | 1.4494    |
| D-Sedoheptulose 7-phosphate | HMDB0001068 | -1.2123  | 1.3039    |
| D-Mannose 1-phosphate       | HMDB0006330 | -1.1568  | 1.5243    |
| Pantothenic acid            | HMDB0000210 | -1.1358  | 1.5353    |
| Uridine                     | HMDB0000296 | -1.0763  | 1.3512    |
| Oxidized glutathione        | HMDB0003337 | -1.0392  | 1.6258    |
| L-Glutamine                 | HMDB0000641 | -1.0391  | 1.6987    |
| Oxalacetic acid             | HMDB0000223 | 1.0254   | 1.3932    |
| Pipecolic acid              | HMDB0000070 | 1.1785   | 1.7852    |
| NADP                        | HMDB0000217 | 1.2378   | 2.2021    |
| Galactitol                  | HMDB0000107 | 2.4893   | 1.9792    |
| Sepiapterin                 | HMDB0000238 | 18.751   | 1.7905    |
| L-Threoneopterin            | HMDB0000727 | 19.025   | 1.7929    |
| Acetyl-CoA                  | HMDB0001206 | 19.131   | 2.6147    |
| Cysteine-S-sulfate          | HMDB0000731 | 19.472   | 2.6189    |
| Deoxyguanosine              | HMDB0000085 | 20.25    | 2.6193    |
| 5,6-Dihydrouridine          | HMDB0000497 | 20.598   | 2.6195    |
| CDP                         | HMDB0001546 | 20.699   | 2.6206    |
| Cyclic GMP                  | HMDB0001314 | 20.839   | 2.6211    |
| NA                          | HMDB0000218 | 21.669   | 1.7954    |
| Uridine 5'-diphosphate      | HMDB0000295 | 27.773   | 11.405    |
| 17-Hydroxyprogesterone      | HMDB0000374 | 23.481   | 1.3034    |
| Quinolinic acid             | HMDB0000232 | 22.37    | 1.3759    |
| Fructose 6-phosphate        | HMDB0000124 | 23.399   | 1.4249    |

**Table S3:** Statistically significant dysregulated pathways in CRD patients compared to healthy control based on metabolomics profiling of their serum samples.

| Pathway Name | -log(p) | FDR | Impact |
|--------------|---------|-----|--------|
|--------------|---------|-----|--------|

---

|                                                     |      |      |      |
|-----------------------------------------------------|------|------|------|
| Aminoacyl-tRNA biosynthesis                         | 2.64 | 0.18 | 0.00 |
| Arginine biosynthesis                               | 2.37 | 0.18 | 0.31 |
| Tryptophan metabolism                               | 1.81 | 0.44 | 0.41 |
| Cysteine and methionine metabolism                  | 1.63 | 0.47 | 0.31 |
| Nitrogen metabolism                                 | 1.47 | 0.47 | 0.00 |
| D-Glutamine and D-glutamate metabolism              | 1.47 | 0.47 | 0.50 |
| Alanine, aspartate and glutamate metabolism         | 1.30 | 0.60 | 0.33 |
| Tyrosine metabolism                                 | 1.23 | 0.62 | 0.22 |
| Ubiquinone and other terpenoid-quinone biosynthesis | 1.14 | 0.68 | 0.00 |

**Table S4:** Significantly changed metabolites in CRD patients compared to healthy control based on their serum metabolic profile. (FDRp and Fold change cut-offs are 0.05, and 2, respectively)

| Name of the metabolite                 | FC   | log2(FC) | p-value  | -Log10(p) |
|----------------------------------------|------|----------|----------|-----------|
| 2-Amino-3-carboxymuconate semialdehyde | 0.07 | -3.93    | 3.3E-30  | 29.48     |
| Glutamine                              | 0.14 | -2.80    | 2.63E-23 | 22.58     |
| Gamma-Amino-gamma-cyanobutanoic acid   | 0.19 | -2.38    | 3.33E-22 | 21.48     |
| Cystine                                | 0.13 | -2.98    | 9.95E-21 | 20.00     |
| Isoglutamine                           | 0.23 | -2.13    | 5.35E-20 | 19.27     |
| Morpholine                             | 3.28 | 1.71     | 2.46E-18 | 17.61     |
| Leucyl-Glutamate                       | 4.64 | 2.21     | 4.55E-18 | 17.34     |
| Glutamyl-Glutamine                     | 0.09 | -3.46    | 7.31E-18 | 17.14     |
| 2-Amino-4-chloro-4-pentenoic acid      | 0.12 | -3.09    | 4.68E-17 | 16.33     |
| Glutaminy-Glutamic acid                | 0.10 | -3.29    | 7.8E-17  | 16.11     |
| Isoleucyl-Aspartate                    | 5.90 | 2.56     | 1.16E-16 | 15.93     |
| 3,4-Dihydroxystyrene                   | 0.19 | -2.38    | 1.35E-16 | 15.87     |
| Glutamyl-Glutamine                     | 0.11 | -3.13    | 2.28E-16 | 15.64     |
| Prolyl-Glutamine                       | 0.17 | -2.56    | 3.37E-16 | 15.47     |
| 3-Methylsalicylaldehyde                | 0.22 | -2.17    | 6.54E-16 | 15.18     |
| 4-Hydroxy-3-methylbenzaldehyde         | 0.21 | -2.27    | 7.07E-16 | 15.15     |
| Glycyl-Tyrosine                        | 9.39 | 3.23     | 1.17E-15 | 14.93     |
| 5,6-Dihydroxyindole -                  | 7.69 | 2.94     | 1.45E-15 | 14.84     |
| Glycyl-Phenylalanine                   | 0.10 | -3.36    | 1.66E-15 | 14.78     |
| Serotonin                              | 0.04 | -4.61    | 2.41E-15 | 14.62     |



|                                              |       |       |          |       |
|----------------------------------------------|-------|-------|----------|-------|
| L-4-Hydroxyglutamate semialdehyde            | 4.08  | 2.03  | 8.75E-15 | 14.06 |
| 5-Hydroxy-L-tryptophan                       | 0.12  | -3.03 | 1.42E-14 | 13.85 |
| N6-Methyllysine                              | 9.46  | 3.24  | 6.04E-14 | 13.22 |
| N-Methyl aspartic acid                       | 2.50  | 1.32  | 7.48E-14 | 13.13 |
| 4-Hydroxy-2,6-dimethylaniline                | 0.14  | -2.83 | 9.02E-14 | 13.05 |
| 2-Hydroxy-6-oxonona-2,4-diene-1,9-dioic acid | 0.31  | -1.71 | 1.75E-13 | 12.76 |
| Porphobilinogen                              | 6.06  | 2.60  | 1.81E-13 | 12.74 |
| 5-Aminopentanamide                           | 5.91  | 2.56  | 3.01E-13 | 12.52 |
| S-Glutathionyl-L-cysteine                    | 0.11  | -3.15 | 3.78E-13 | 12.42 |
| Dihydrocapsaicin                             | 4.37  | 2.13  | 7.66E-13 | 12.12 |
| 4-Chloro-L-lysine                            | 0.18  | -2.48 | 1.24E-12 | 11.91 |
| Histidiny-Alanine                            | 11.84 | 3.57  | 4.33E-12 | 11.36 |
| N-2S-2-Amino-2-carboxyethyl-L-glutamic acid  | 10.03 | 3.33  | 9.44E-12 | 11.03 |
| 4-Hydroxyphenylacetaldehyde                  | 0.35  | -1.52 | 9.44E-12 | 11.03 |
| Tabtoxin biosynthesis intermediate           | 5.81  | 2.54  | 1.03E-11 | 10.99 |
| Methylguanidine                              | 5.30  | 2.41  | 1.05E-11 | 10.98 |
| Lysyl-Threonine                              | 11.76 | 3.56  | 1.67E-11 | 10.78 |
| Glutamic Acid                                | 4.13  | 2.04  | 1.79E-11 | 10.75 |
| Alanyl-Methionine                            | 18.69 | 4.22  | 2.17E-11 | 10.66 |
| Diethanolamine                               | 0.32  | -1.63 | 2.41E-11 | 10.62 |
| Methionyl-Alanine sulfoxide                  | 5.39  | 2.43  | 4.72E-11 | 10.33 |

|                                                         |       |       |          |       |
|---------------------------------------------------------|-------|-------|----------|-------|
| Glutamic Acid                                           | 3.50  | 1.81  | 5.59E-11 | 10.25 |
| Methionine                                              | 0.32  | -1.63 | 6.54E-11 | 10.19 |
| L-beta-Ethynylserine                                    | 2.70  | 1.43  | 7.06E-11 | 10.15 |
| Glycyl-Leucine                                          | 3.67  | 1.87  | 8.81E-11 | 10.06 |
| 2-2-Aminoethylcarbamoylmethyl-2-hydroxybutanedioic acid | 27.63 | 4.79  | 1.6E-10  | 9.80  |
| 7-Carboxy-7-carbaguanine                                | 0.34  | -1.55 | 2.1E-10  | 9.68  |
| Phenylalanyl-Glutamate                                  | 0.16  | -2.64 | 3.44E-10 | 9.46  |
| Kanosamine 6-phosphate                                  | 0.35  | -1.50 | 4.15E-10 | 9.38  |
| Tyrosine 2 tags 2 charges                               | 0.38  | -1.41 | 4.93E-10 | 9.31  |
| 2,6-Diamino-4-hydroxy-5-N-methylformamidopyrimidine     | 0.37  | -1.42 | 6.49E-10 | 9.19  |
| Asparagine                                              | 0.36  | -1.49 | 9.23E-10 | 9.03  |
| N-Formyl-4-amino-5-aminomethyl-2-methylpyrimidine       | 0.42  | -1.24 | 1.53E-09 | 8.81  |
| Seryl-Threonine                                         | 0.29  | -1.78 | 1.67E-09 | 8.78  |
| Methionine                                              | 0.33  | -1.61 | 1.82E-09 | 8.74  |
| Xanthine                                                | 0.34  | -1.56 | 1.94E-09 | 8.71  |
| Cysteinyl-Glycine dimer                                 | 0.34  | -1.56 | 2.65E-09 | 8.58  |
| 2-Methoxy-4-vinylphenol                                 | 2.49  | 1.31  | 3.45E-09 | 8.46  |
| Aspartyl-Phenylalanine                                  | 0.16  | -2.66 | 4.02E-09 | 8.40  |
| Phenylalanyl-Serine                                     | 0.20  | -2.31 | 4.45E-09 | 8.35  |
| Phenylalanyl-Tryptophan                                 | 0.30  | -1.72 | 5.87E-09 | 8.23  |
| Tryptophan                                              | 0.45  | -1.14 | 9.42E-09 | 8.03  |
| Guanidoacetic acid                                      | 0.49  | -1.02 | 9.48E-09 | 8.02  |

|                                     |       |       |          |      |
|-------------------------------------|-------|-------|----------|------|
| L-2-Amino-6-oxoheptanedioic acid    | 0.27  | -1.90 | 9.95E-09 | 8.00 |
| Isomer 2 of Sarcosine               | 2.54  | 1.35  | 1.64E-08 | 7.79 |
| 4-Hydroxybenzoic acid               | 0.44  | -1.17 | 4E-08    | 7.40 |
| 3-Cyano-L-alanine                   | 0.43  | -1.22 | 4.65E-08 | 7.33 |
| Alanyl-Proline                      | 4.22  | 2.08  | 5.3E-08  | 7.28 |
| p-Coumaroylagmatine                 | 3.72  | 1.90  | 5.97E-08 | 7.22 |
| Isoleucyl-Threonine                 | 26.68 | 4.74  | 6.21E-08 | 7.21 |
| Phenylalanyl-Leucine                | 0.26  | -1.92 | 7.79E-08 | 7.11 |
| Phenylalanyl-Phenylalanine          | 0.33  | -1.59 | 1.24E-07 | 6.91 |
| Guaiacol                            | 0.33  | -1.58 | 1.7E-07  | 6.77 |
| Glycyl-Valine                       | 0.04  | -4.61 | 1.84E-07 | 6.74 |
| Alanyl-Glutamic acid                | 0.42  | -1.25 | 2.1E-07  | 6.68 |
| Alanyl-Serine                       | 0.18  | -2.51 | 2.54E-07 | 6.60 |
| Maltol                              | 0.31  | -1.71 | 3.03E-07 | 6.52 |
| Isomer 1 of 7,8-Dihydroxanthopterin | 0.42  | -1.27 | 3.18E-07 | 6.50 |
| Threoninyl-Lysine                   | 10.41 | 3.38  | 3.87E-07 | 6.41 |
| Homoarginine                        | 0.35  | -1.51 | 3.96E-07 | 6.40 |
| Glutamyl-Methionine                 | 0.40  | -1.34 | 3.96E-07 | 6.40 |
| Uridine                             | 0.43  | -1.22 | 4.14E-07 | 6.38 |
| Alanyl-Alanine                      | 3.28  | 1.71  | 4.26E-07 | 6.37 |
| 7,8-Diaminononanoic acid            | 2.62  | 1.39  | 4.41E-07 | 6.36 |
| Uridine                             | 0.43  | -1.21 | 6.39E-07 | 6.19 |
| Glycyl-Histidine                    | 6.18  | 2.63  | 6.46E-07 | 6.19 |
| Valyl-Glycine                       | 2.39  | 1.26  | 7.34E-07 | 6.13 |
| 11,20-Dihydroxysugiol               | 2.32  | 1.21  | 1.02E-06 | 5.99 |

|                                   |       |       |           |      |
|-----------------------------------|-------|-------|-----------|------|
| Valyl-Valine                      | 2.47  | 1.30  | 1.51E-06  | 5.82 |
| 4-Formylsalicylic acid            | 0.45  | -1.15 | 1.74E-06  | 5.76 |
| Prolyl-Glutamate                  | 3.16  | 1.66  | 1.99E-06  | 5.70 |
| 4-Methylene-L-glutamic acid       | 31.89 | 5.00  | 2.44E-06  | 5.61 |
| Histidinyl-Lysine                 | 6.87  | 2.78  | 2.99E-06  | 5.52 |
| Glutamyl-Tyrosine                 | 0.18  | -2.50 | 3.16E-06  | 5.50 |
| Iminodiacetic acid                | 2.73  | 1.45  | 3.95E-06  | 5.40 |
| 2,4-Dichlorophenol                | 4.44  | 2.15  | 7.89E-06  | 5.10 |
| N2-Succinyl-L-ornithine           | 2.44  | 1.29  | 7.97E-06  | 5.10 |
| Leucyl-Valine                     | 2.02  | 1.01  | 8.64E-06  | 5.06 |
| 5-Aminopentanoic acid             | 2.07  | 1.05  | 9.27E-06  | 5.03 |
| Arginine                          | 0.41  | -1.30 | 0.000014  | 4.94 |
| Homomethionine                    | 2.14  | 1.10  | 0.0000114 | 4.94 |
| Asparaginyl-Lysine 2              | 2.04  | 1.03  | 0.000018  | 4.74 |
| 5-Aminopentanoic acid             | 2.01  | 1.01  | 0.0000199 | 4.70 |
| 5-L-Glutamyl-aurine               | 3.54  | 1.82  | 0.0000238 | 4.62 |
| Lysyl-Isoleucine                  | 3.20  | 1.68  | 0.0000262 | 4.58 |
| Isoleucyl-Glycine                 | 2.05  | 1.04  | 0.0000305 | 4.52 |
| Gamma-Glutamylglutamic acid       | 3.23  | 1.69  | 0.000033  | 4.48 |
| Seryl-Asparagine                  | 3.35  | 1.75  | 0.0000364 | 4.44 |
| Isoleucyl-Alanine                 | 2.17  | 1.12  | 0.0000381 | 4.42 |
| Salicylic acid                    | 4.91  | 2.30  | 0.0000513 | 4.29 |
| Valyl-Alanine                     | 2.29  | 1.20  | 0.0000617 | 4.21 |
| Isomer 1 of Arginine              | 0.45  | -1.14 | 0.0000633 | 4.20 |
| Isomer 2 of 5-Aminopentanoic acid | 2.01  | 1.00  | 0.0000729 | 4.14 |

|                                           |      |       |           |      |
|-------------------------------------------|------|-------|-----------|------|
| N6-Acetyl-LL-2,6-diaminoheptanedioic acid | 2.37 | 1.25  | 0.0000777 | 4.11 |
| Aspartyl-Alanine                          | 2.73 | 1.45  | 0.0000791 | 4.10 |
| 3-3,4-Dihydroxyphenyllactic acid -        | 6.63 | 2.73  | 0.0000804 | 4.09 |
| Tyrosyl-Asparagine                        | 0.47 | -1.08 | 0.0000908 | 4.04 |
| Glutamyl-Glycine                          | 0.39 | -1.37 | 0.0001175 | 3.93 |
| Asparaginyl-Proline                       | 2.75 | 1.46  | 0.0001469 | 3.83 |
| Glycyl-Arginine                           | 3.00 | 1.58  | 0.0001476 | 3.83 |
| N-L-Argininosuccinic acid                 | 2.12 | 1.08  | 0.0001543 | 3.81 |
| Calystegin A3                             | 2.78 | 1.48  | 0.0001554 | 3.81 |
| gamma-Glutamyl-beta-cyanoalanine          | 0.09 | -3.48 | 0.0001984 | 3.70 |
| Asparaginyl-Phenylalanine                 | 4.15 | 2.05  | 0.0002966 | 3.53 |
| 4-Hydroxyphenylacetylglutamic acid        | 2.84 | 1.51  | 0.0003651 | 3.44 |
| Asparaginyl-Isoleucine                    | 2.05 | 1.03  | 0.0003828 | 3.42 |
| Homogentisic acid                         | 0.47 | -1.08 | 0.0003844 | 3.42 |
| Cystathionine                             | 2.46 | 1.30  | 0.0004164 | 3.38 |
| S-Adenosylhomocysteine                    | 2.14 | 1.10  | 0.0004662 | 3.33 |
| Isomer 1 of Isoleucine                    | 2.48 | 1.31  | 0.0004985 | 3.30 |
| Seryl-Serine                              | 2.74 | 1.45  | 0.0004994 | 3.30 |
| 1-Methylhistidine                         | 2.10 | 1.07  | 0.0004994 | 3.30 |
| 3-Aminoisobutanoic acid                   | 2.46 | 1.30  | 0.000512  | 3.29 |
| Neuraminic acid                           | 2.17 | 1.12  | 0.0005696 | 3.24 |
| 2,4-Diaminotoluene                        | 0.42 | -1.26 | 0.0006235 | 3.21 |

|                                          |      |       |           |      |
|------------------------------------------|------|-------|-----------|------|
| 4-Hydroxy-3-methylbenzoic acid           | 2.45 | 1.29  | 0.0006811 | 3.17 |
| Isomer 1 of Leucyl-Aspartate             | 3.40 | 1.77  | 0.0007171 | 3.14 |
| Phenylalanyl-Arginine                    | 3.29 | 1.72  | 0.0007541 | 3.12 |
| N-Hydroxy-L-phenylalanine                | 0.43 | -1.20 | 0.0007628 | 3.12 |
| L-gamma-Glutamyl-3R-L-beta-ethynylserine | 4.10 | 2.03  | 0.0010939 | 2.96 |
| Uracil                                   | 3.50 | 1.81  | 0.0011447 | 2.94 |
| Lysyl-Methionine                         | 2.60 | 1.38  | 0.0011569 | 2.94 |
| Homocitrulline                           | 2.68 | 1.42  | 0.0012446 | 2.91 |
| 3-Aminoisobutanoic acid                  | 2.34 | 1.23  | 0.0012446 | 2.91 |
| L-Pipecolic acid                         | 0.45 | -1.15 | 0.0012929 | 2.89 |
| Seryl-Aspartic acid                      | 2.70 | 1.43  | 0.0013021 | 2.89 |
| Leucyl-Arginine                          | 2.83 | 1.50  | 0.0014207 | 2.85 |
| Histidinyl-Tryptophan                    | 2.59 | 1.37  | 0.0015907 | 2.80 |
| Tyrosyl-Aspartate                        | 2.59 | 1.38  | 0.0016086 | 2.79 |
| Guanosine                                | 0.12 | -3.00 | 0.0019267 | 2.72 |
| Ophthalmic acid                          | 3.76 | 1.91  | 0.0020433 | 2.69 |
| Isoleucyl-Valine                         | 3.16 | 1.66  | 0.0022256 | 2.65 |
| Theophylline                             | 0.34 | -1.56 | 0.0023515 | 2.63 |
| Homovanillic acid                        | 2.98 | 1.58  | 0.0024418 | 2.61 |
| D-Lysopine                               | 2.30 | 1.20  | 0.0024418 | 2.61 |
| Valyl-Phenylalanine                      | 0.43 | -1.21 | 0.0025074 | 2.60 |
| gamma-Glutamylalanine                    | 2.30 | 1.20  | 0.0025099 | 2.60 |
| Isoleucyl-Phenylalanine                  | 7.91 | 2.98  | 0.0032487 | 2.49 |
| Phenylalanyl-Aspartate                   | 2.41 | 1.27  | 0.0036135 | 2.44 |
| Threoninyl-Glutamine                     | 0.48 | -1.06 | 0.0036149 | 2.44 |

|                                        |      |       |           |      |
|----------------------------------------|------|-------|-----------|------|
| Glycyl-Proline                         | 4.88 | 2.29  | 0.0061695 | 2.21 |
| Leucyl-Threonine                       | 2.01 | 1.01  | 0.013516  | 1.87 |
| Ascorbic acid                          | 2.70 | 1.43  | 0.013557  | 1.87 |
| Glutamyl-Leucine                       | 2.85 | 1.51  | 0.014624  | 1.83 |
| 1-Phenylethylamine                     | 4.17 | 2.06  | 0.015548  | 1.81 |
| Isomer 1 of 4-Hydroxy-L-tryptophan     | 2.08 | 1.06  | 0.017426  | 1.76 |
| Tryptophyl-Asparagine                  | 3.92 | 1.97  | 0.017747  | 1.75 |
| Lochnericine                           | 0.29 | -1.80 | 0.0273    | 1.56 |
| Salicyluric acid                       | 3.15 | 1.65  | 0.027782  | 1.56 |
| Leucyl-Isoleucine                      | 2.01 | 1.01  | 0.03122   | 1.51 |
| Isomer 2 of 6-Amino-2-oxohexanoic acid | 2.24 | 1.17  | 0.035817  | 1.45 |
| 4-Methylene-L-glutamine                | 2.43 | 1.28  | 0.041034  | 1.39 |
| Histidinyl-Aspartate                   | 2.49 | 1.32  | 0.043132  | 1.37 |
| 2-Decarboxy-cyclo-dopa                 | 3.16 | 1.66  | 0.045603  | 1.34 |
| 2-Aminomuconic acid                    | 2.40 | 1.26  | 0.048602  | 1.31 |
| 2-Aminobenzoic acid                    | 3.06 | 1.61  | 0.048699  | 1.31 |

**Table S5:** ROCs in DBS of CRD patients

| Name | AUC | T-tests | Log2 FC |
|------|-----|---------|---------|
|------|-----|---------|---------|

|                                  |       |           |        |
|----------------------------------|-------|-----------|--------|
| Isoleucine                       | 0.960 | 1.07E-06  | -3.774 |
| Asparagine                       | 0.952 | 1.85E-04  | -9.592 |
| Gama Amino Butyric               | 0.944 | 5.71E-05  | -1.244 |
| Leucine                          | 0.944 | 1.82E-06  | -3.722 |
| Uridine di phosphate             | 0.944 | 1.66E-08  | 5.775  |
| Threonine                        | 0.937 | 1.96E-05  | -3.241 |
| 2,3,Pyridinedicarboxylic acid    | 0.937 | 2.12E-04  | 6.026  |
| Tyrosine                         | 0.929 | 2.47E-06  | -5.832 |
| Ornithine                        | 0.929 | 5.52E-05  | -2.827 |
| Histidine                        | 0.921 | 9.70E-06  | -4.441 |
| N-Acetyl Glucosamine 1 phosphate | 0.897 | 5.67E-05  | 5.480  |
| Ornithine                        | 0.889 | 0.0039036 | -3.137 |
| Niacinamide                      | 0.881 | 0.0011873 | -4.096 |
| Progesterone                     | 0.873 | 0.0010556 | -1.478 |
| Mannitol                         | 0.873 | 0.069393  | 3.167  |
| Dulcitol                         | 0.869 | 3.94E-04  | 3.435  |
| Saccharopine                     | 0.861 | 0.036475  | -3.089 |
| Homovanillic acid                | 0.857 | 0.0017076 | -0.541 |
| Malonic acid                     | 0.857 | 0.027611  | -1.860 |
| Cytidine                         | 0.857 | 5.95E-04  | -2.317 |
| Orotic acid                      | 0.857 | 0.0094314 | -0.406 |
| 2-Deoxyribose 5 phosphate        | 0.853 | 1.13E-04  | -4.610 |
| 2-ketobutyric acid               | 0.849 | 0.0017183 | -3.537 |
| Isoxanthopterin                  | 0.841 | 8.33E-04  | -1.703 |
| Nicotinic acid mononucleotide    | 0.837 | 0.0078698 | 4.751  |
| cGMP                             | 0.833 | 5.94E-05  | 2.493  |
| Cytiidne 5 diphosphate           | 0.833 | 5.58E-05  | 2.563  |



|                              |       |           |        |
|------------------------------|-------|-----------|--------|
| Pipecolinic acid             | 0.825 | 0.0033065 | 5.262  |
| Diidhyouracil                | 0.825 | 0.015533  | -0.620 |
| Alpha keto glutaric acid     | 0.817 | 0.11345   | -1.055 |
| Mevalonic acid 5 phosphate   | 0.810 | 0.029023  | -2.455 |
| 4,6,Dioxoheptanoic acid      | 0.802 | 0.021109  | -2.011 |
| 4-Hydroxyphenylpyruvic acid  | 0.802 | 0.023305  | -2.030 |
| 21-Deoxycortisol             | 0.802 | 0.0043796 | 0.924  |
| Nicotinamide ribotide        | 0.794 | 0.010658  | 3.364  |
| Aminoadipic                  | 0.790 | 0.0027914 | 2.322  |
| 5-Hydroxylysine HCL          | 0.786 | 0.013782  | 2.848  |
| Thymidine                    | 0.786 | 0.0068864 | 2.690  |
| Kynurenine                   | 0.786 | 0.004125  | -1.171 |
| 17 Alpha hydroxyprogesterone | 0.782 | 0.03639   | 2.881  |
| Thymine                      | 0.782 | 0.0080165 | -2.058 |
| Oxaloacetate                 | 0.778 | 0.0059765 | 0.093  |
| N-Acetylspermine             | 0.778 | 0.15599   | -0.707 |
| 2-Deoxyguanosine             | 0.778 | 6.76E-04  | 1.949  |

**Table S6:** ROCs in serum of CRD patients

| Name                                                    | AUC | T-tests    | Log2 FC |
|---------------------------------------------------------|-----|------------|---------|
| 2,6-Diamino-4-hydroxy-5-N-methylformamidopyrimidine     | 1   | 1.3242E-10 | 1.303   |
| 2-2-Aminoethylcarbamoylmethyl-2-hydroxybutanedioic acid | 1   | 9.8386E-12 | -4.847  |
| 2-Amino-3-carboxymuconate semialdehyde                  | 1   | 5.412E-33  | 3.814   |
| 2-Amino-4-chloro-4-pentenoic acid                       | 1   | 1.1727E-18 | 3.285   |
| 2-Hydroxy-6-oxonona-2,4-diene-1,9-dioic acid            | 1   | 3.9638E-14 | 1.550   |
| 3,4-Dihydroxystyrene                                    | 1   | 3.7147E-18 | 2.234   |
| 3-Cyano-L-alanine                                       | 1   | 3.3714E-08 | 1.264   |
| 3-Methylsalicylaldehyde                                 | 1   | 3.1729E-17 | 1.993   |
| 4-Chloro-L-lysine                                       | 1   | 2.4036E-13 | 2.307   |
| 4-Hydroxy-2,6-dimethylaniline                           | 1   | 1.2843E-14 | 2.397   |
| 4-Hydroxy-3-methylbenzaldehyde                          | 1   | 3.3595E-17 | 2.113   |
| 4-Hydroxyphenylacetaldehyde                             | 1   | 1.6169E-12 | 1.433   |
| 5,6-Dihydroxyindole                                     | 1   | 4.1314E-17 | -2.726  |
| 5-Aminopentanamide                                      | 1   | 1.7045E-14 | -2.429  |
| 5-Hydroxy-L-tryptophan                                  | 1   | 1.8997E-15 | 2.927   |
| 7,8-Diaminononanoic acid                                | 1   | 1.5393E-08 | -1.313  |
| Alanyl-Alanine                                          | 1   | 3.3577E-08 | -1.770  |
| Alanyl-Methionine                                       | 1   | 1.7603E-12 | -3.930  |
| Alanyl-Proline                                          | 1   | 2.2861E-09 | -1.612  |
| Asparagine                                              | 1   | 4.1142E-10 | 1.536   |
| Cystine                                                 | 1   | 1.3943E-21 | 2.831   |
| Deethylatrazine                                         | 1   | 8.6555E-12 | 0.714   |
| Dihydrocapsaicin                                        | 1   | 9.2822E-15 | -2.213  |
| Glutamic Acid                                           | 1   | 2.5446E-13 | -2.192  |
| Glutamine                                               | 1   | 7.6693E-25 | 2.647   |

|                                                  |   |            |        |
|--------------------------------------------------|---|------------|--------|
| Glutamyl-Glutamine                               | 1 | 4.06E-19   | 3.386  |
| Glycyl-Leucine                                   | 1 | 2.6662E-12 | -1.972 |
| Glycyl-Phenylalanine                             | 1 | 1.5604E-16 | 3.132  |
| Glycyl-Tyrosine                                  | 1 | 1.9258E-17 | -3.213 |
| Histidiny-Alanine                                | 1 | 1.6416E-13 | -2.723 |
| Isoglutamine                                     | 1 | 5.8087E-21 | 1.976  |
| Isoleucyl-Aspartate                              | 1 | 2.9558E-19 | -2.570 |
| Isomer 1 of Cystine                              | 1 | 1.0797E-21 | 2.814  |
| Isomer 1 of Glutamic Acid                        | 1 | 4.9158E-13 | -2.149 |
| Isomer 1 of Glutamyl-Glutamine                   | 1 | 2.0405E-17 | 3.123  |
| Isomer 1 of Methionine                           | 1 | 1.5993E-11 | 1.566  |
| Isomer 1 of Phenylalanine                        | 1 | 1.157E-11  | 0.720  |
| Isomer 2 of gamma-Amino-gamma-cyanobutanoic acid | 1 | 9.7851E-24 | 2.207  |
| Isomer 2 of Glutamic Acid                        | 1 | 7.5531E-13 | -2.102 |
| Isomer 2 of Sarcosine                            | 1 | 2.5355E-10 | -1.506 |
| Kanosamine 6-phosphate                           | 1 | 1.3475E-10 | 1.359  |
| L-4-Hydroxyglutamate semialdehyde                | 1 | 2.8515E-17 | -2.152 |
| L-beta-Ethynylserine                             | 1 | 8.4373E-13 | -1.584 |
| Leucyl-Glutamate                                 | 1 | 2.7977E-21 | -2.310 |
| Lysyl-Threonine                                  | 1 | 1.0627E-12 | -2.901 |
| Methionyl-Alanine sulfoxide                      | 1 | 3.1491E-12 | -2.302 |
| Methylguanidine                                  | 1 | 2.6725E-13 | -2.234 |
| Morpholine                                       | 1 | 2.6124E-22 | -1.467 |
| N6-Methyllysine                                  | 1 | 1.0228E-15 | -3.094 |
| N-2S-2-Amino-2-carboxyethyl-L-glutamic acid      | 1 | 1.6339E-13 | -3.347 |
| N-Methyl aspartic acid                           | 1 | 9.4909E-17 | -1.421 |
| Phenylalanine                                    | 1 | 7.8451E-12 | 0.751  |

|                                    |       |            |        |
|------------------------------------|-------|------------|--------|
| Phenylalanyl-Phenylalanine         | 1     | 5.6324E-08 | 1.378  |
| Porphobilinogen                    | 1     | 1.5372E-15 | -2.647 |
| Prolyl-Glutamine                   | 1     | 3.7101E-17 | 2.367  |
| Salviol                            | 1     | 3.0775E-12 | -0.992 |
| Sarcosine                          | 1     | 1.5837E-10 | -0.873 |
| Serotonin                          | 1     | 3.6956E-16 | 4.172  |
| eryl-Threonine                     | 1     | 1.0702E-09 | 1.696  |
| Tabtoxin biosynthesis              | 1     | 1.6566E-13 | -2.571 |
| Tyrosine                           | 1     | 9.3861E-11 | 1.306  |
| 7-Carboxy-7-carbaguanine           | 0.995 | 8.2794E-11 | 1.408  |
| Glycyl-Valine                      | 0.995 | 5.2643E-08 | 3.714  |
| Guaiacol                           | 0.995 | 5.7539E-08 | 0.731  |
| Homoarginine                       | 0.995 | 2.0214E-07 | 1.400  |
| Isomer 1 of Glycine                | 0.995 | 2.5239E-11 | -1.011 |
| Isomer 1 of Iminodiacetic acid     | 0.995 | 2.2635E-07 | -1.661 |
| Maltol                             | 0.995 | 2.0002E-07 | 1.819  |
| Phenylalanyl-Glutamate             | 0.995 | 7.0729E-11 | 2.432  |
| Prolyl-Glutamate                   | 0.995 | 1.0531E-07 | -1.741 |
| S-Glutathionyl-L-cysteine          | 0.995 | 4.8284E-14 | 3.698  |
| 11,20-Dihydroxysugiol              | 0.99  | 5.4721E-08 | -1.314 |
| Guanidoacetic acid                 | 0.99  | 7.2084E-09 | 0.896  |
| Isomer 1 of 3-Hydroxymandelic acid | 0.99  | 3.483E-08  | -0.706 |
| L-Norleucine                       | 0.99  | 7.0961E-08 | 0.648  |
| Methionine                         | 0.99  | 5.6423E-10 | 1.582  |
| Phenylalanyl-Serine                | 0.99  | 2.4646E-09 | 2.189  |
| Serine                             | 0.99  | 8.4276E-08 | 0.897  |
| Uridine                            | 0.99  | 8.2036E-07 | 1.026  |

---

|                                 |       |            |        |
|---------------------------------|-------|------------|--------|
| 2-Methoxy-4-vinylphenol         | 0.984 | 4.2727E-11 | -1.471 |
| 4-Hydroxybenzoic acid           | 0.984 | 1.3871E-08 | 1.002  |
| Alanyl-Serine                   | 0.984 | 1.3652E-07 | 2.395  |
| Phenylalanyl-Tryptophan         | 0.984 | 2.2433E-09 | 1.823  |
| Thyroxine                       | 0.984 | 3.2451E-09 | 0.850  |
| Tryptophan                      | 0.984 | 4.5283E-09 | 1.021  |
| 2R,4S-2,4-Diaminopentanoic acid | 0.979 | 9.1234E-10 | -0.881 |
| Aminoacrylic acid               | 0.979 | 1.234E-07  | 0.896  |
